# Supplementary material
Source: PubMed Central journal article supplement (PMC6488934)
Supplement: NIHMS1017216-supplement-2.pdf [file NIHMS1017216-supplement-2.pdf]

# Blockade of TREM-1 prevents vitreoretinal neovascularization in mice with oxygen-induced retinopathy

Modesto A. Rojas, Zu T. Shen, Ruth B. Caldwell, Alexander B. Sigalov

## SUPPLEMENTAL DATA

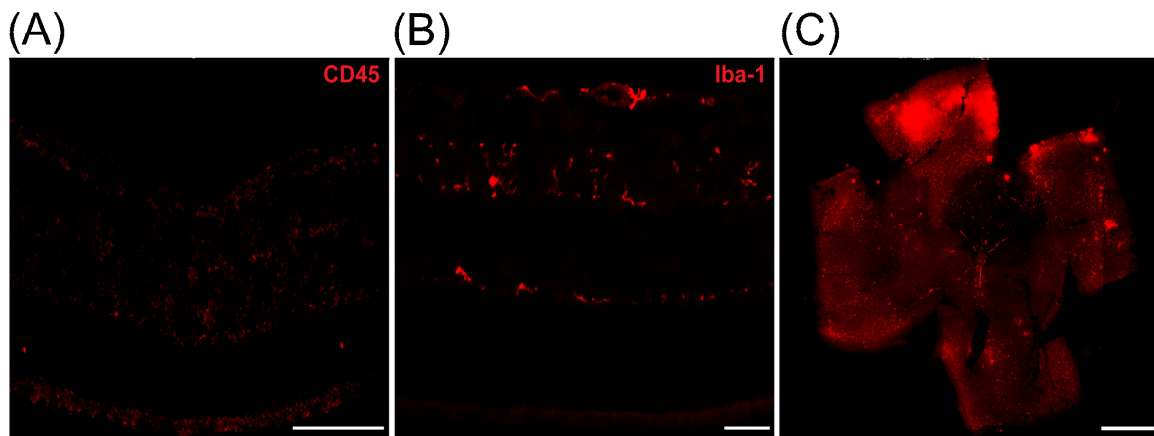

**Supplemental Figure 1.** (A, B) Representative retinal cryosections from room air (RA) mice at P17 were immunolabeled with antibodies against the leukocyte marker CD45 (A) and the macrophage/microglial marker Iba-1 (B). Scale bar = 20  $\mu\text{m}$ . (C) IFA of a representative retina flat-mount confirms that systemically (i.p.) administered rhodamine B-labeled GA/GE31-HDL penetrate the blood-retinal barrier and accumulate in the retina, delivering their payload. Scale bar = 500  $\mu\text{m}$ .
